# Supplementary material for: Clinical Course of Ophthalmic Findings and Potential Influence Factors of Herpesvirus Infections: 18 Month Follow-Up of a Closed Herd of Lipizzaners
Source: PLoS One. 2013 Nov 20;8(11):e79888. doi: 10.1371/journal.pone.0079888 (PMC3835803; doi:10.1371/journal.pone.0079888)
Supplement: Table S1 — Overview of influence factors, ophthalmic findings and herpesvirus results over 18 months. (XLSX) [file pone.0079888.s001.xlsx]

## Sheet: Table 1
Table: Overview of influence factors, ophthalmic findings and herpesvirus results over 18 months
2011-04-01										Oct.11								2012-04-01								Oct.12
NR	gender	age	location	housing	training	ophthalmic finding	herpesvirus blood	herpesvirus nasal swab	herpesvirus conjunctiva	location	housing	training	transport	ophthalmic finding	herpesvirus blood	herpesvirus nasal swab	herpesvirus conjunctiva	location	housing	training	transport	ophthalmic finding	herpesvirus blood	herpesvirus nasal swab	herpesvirus conjunctiva	location	housing	training	transport	ophthalmic finding	herpesvirus blood	herpesvirus nasal swab	herpesvirus conjunctiva
1	S	3.05	P	B	N	c+k	-	-	2	H	O	Y	Y	k	-	-	-	n.a.	n.a.	n.a.	n.a.	n.a.	n.a.	n.a.	n.a.	n.a.	n.a.	n.a.	n.a.	n.a.	n.a.	n.a.	n.a.
2	S	3.19167	P	B	N	c+b	-	2	2	H	O	Y	Y	c+b	-	-	-	H	O	Y	Y	c+k+b	-	-	-	H	O	Y	Y	c+k+b	-	-	5
3	S	1	P	F	N	c+k	2	2+5	2+5	P	F	N	N	c	-	2	5	P	F	N	N	s	-	-	-	P	F	N	N	c+k	-	-	-
4	S	3.06944	P	B	N	c	2	2+5	2+5	P	F	N	N	s	2	2+5	2	P	B	N	N	s	-	2	-	n.a.	n.a.	n.a.	n.a.	n.a.	n.a.	n.a.	n.a.
5	S	0.938889	P	F	N	c	2+5	2+5	2+5	P	F	N	N	s	-	2+5	2+5	P	F	N	N	k	-	-	-	P	F	N	N	b	-	2	2
6	S	2.98889	P	B	N	c+k	2	5	5	P	F	N	N	c+b	-	5	5	P	B	N	N	c+b	2	2+5	5	P	B	N	N	c+b	-	2+5	2
7	S	0.944444	P	F	N	c+b	2+5	2+5	2+5	P	F	N	N	c+b	2+5	2+5	2+5	P	F	N	N	c+b	2	2+5	-	P	F	N	N	c+b	2+5	5	5
8	S	2.96389	P	F	N	c	-	5	-	H	O	Y	Y	c+b	-	2	-	H	O	Y	Y	c+b	-	2	-	V	B	Y	N	c+b	-	-	-
9	S	3.25278	P	F	N	b	-	2+5	2+5	H	O	Y	Y	c+b	-	5	-	V	B	Y	N	c+k+b	-	-	-	V	B	Y	Y	c+k+b	-	-	-
10	S	0.95	P	F	N	k+b	2	2+5	2+5	P	F	N	N	c+k+b	5	2+5	-	P	F	N	N	c+k+b	5	2+5	2+5	P	F	N	N	c+b	5	-	2
11	S	3.19167	P	F	N	c+k	-	2	-	H	O	Y	Y	c+k	-	2	-	V	B	Y	N	c+k	-	2	-	n.a.	n.a.	n.a.	n.a.	n.a.	n.a.	n.a.	n.a.
12	S	1.23333	P	F	N	c+b	-	2+5	2+5	P	F	N	N	c+b	-	-	2	P	F	N	N	c+k+b	-	5	5	P	F	N	N	c+b	-	-	-
13	S	0.955556	P	F	N	s	5	2+5	2+5	P	F	N	N	c+k	5	5	5	P	F	N	N	c	5	-	5	P	F	N	N	c	5	5	5
14	S	29.8944	P	B	N	k	-	-	2+5	P	B	N	N	k	-	-	5	P	B	N	N	c+k	-	5	5	n.a.	n.a.	n.a.	n.a.	n.a.	n.a.	n.a.	n.a.
15	S	1.17222	P	F	N	s	-	2+5	2+5	P	F	N	N	c	-	2+5	2	P	F	N	N	c	2	2	-	P	F	N	N	c+b	-	5	5
16	S	0.933333	P	F	N	s	5	2+5	2	P	F	N	N	c+k	5	2+5	-	P	F	N	N	s	-	2	-	P	F	N	N	k	-	2	-
17	S	0.961111	P	F	N	s	2	5	2+5	P	F	N	N	s	-	5	-	P	F	N	N	s	2	-	5	P	F	N	N	c	2+5	-	-
18	S	11.0111	P	B	N	s	-	-	-	P	B	N	N	c+b	-	-	-	n.a.	n.a.	n.a.	n.a.	n.a.	n.a.	n.a.	n.a.	n.a.	n.a.	n.a.	n.a.	n.a.	n.a.	n.a.	n.a.
19	S	2.98611	P	F	N	c	2	5	-	P	F	N	N	c	-	5	-	P	B	N	N	s	-	5	-	n.a.	n.a.	n.a.	n.a.	n.a.	n.a.	n.a.	n.a.
20	S	2.03056	P	F	N	c	2	2+5	2	P	F	N	N	c	-	2+5	2+5	n.a.	n.a.	n.a.	n.a.	n.a.	n.a.	n.a.	n.a.	n.a.	n.a.	n.a.	n.a.	n.a.	n.a.	n.a.	n.a.
21	S	3.12778	P	F	N	c	-	5	-	H	O	Y	Y	c+b	-	-	-	H	O	Y	Y	c+b	-	-	-	H	O	Y	Y	c+b	-	-	-
22	S	1.90278	P	F	N	c	2+5	2+5	2	P	F	N	N	c	5	2+5	2+5	P	F	N	N	s	5	5	5	H	O	Y	Y	c	5	5	5
23	S	0.958333	P	F	N	s	-	2+5	2+5	P	F	N	N	s	-	2+5	2+5	P	F	N	N	c	-	5	-	P	F	N	N	c+k	-	5	2
24	S	3.19444	P	F	N	c+b	-	5	-	P	F	N	N	c+b	-	5	-	n.a.	n.a.	n.a.	n.a.	n.a.	n.a.	n.a.	n.a.	n.a.	n.a.	n.a.	n.a.	n.a.	n.a.	n.a.	n.a.
25	S	2.13056	P	F	N	c+k+b	2	2	2	P	F	N	N	c+k+b	-	-	2	P	F	N	N	c+k+b	5	5	-	n.a.	n.a.	n.a.	n.a.	n.a.	n.a.	n.a.	n.a.
26	S	1.00833	P	F	N	b	2+5	2+5	2+5	P	F	N	N	b	2	2+5	2+5	P	F	N	N	c+b	2+5	-	2	P	F	N	N	b	2+5	2	-
27	S	0.944444	P	F	N	c+b	2+5	2+5	2+5	P	F	N	N	c+b	5	2+5	-	P	F	N	N	c+b	2	5	-	P	F	N	N	c+b	2+5	2+5	2+5
28	S	2.18333	P	F	N	c+b	-	2+5	2+5	P	F	N	N	c+b	-	2+5	-	n.a.	n.a.	n.a.	n.a.	n.a.	n.a.	n.a.	n.a.	n.a.	n.a.	n.a.	n.a.	n.a.	n.a.	n.a.	n.a.
29	S	1.975	P	F	N	c+b	-	2+5	2+5	P	F	N	N	c+k+b	5	5	-	P	F	N	N	c+b	2	5	5	P	F	N	N	c+k+b	2	5	-
30	S	2.02222	P	F	N	c	2+5	5	-	P	F	N	N	s	2+5	5	-	P	F	N	N	k	5	5	-	H	O	Y	Y	k	2	-	-
31	S	2.01111	P	F	N	c+k	-	5	-	P	F	N	N	c+k	2	2+5	5	P	F	N	N	c+k	2	-	-	P	F	N	N	c+k	2	-	-
32	S	32	P	B	N	k	-	2+5	-	P	B	N	N	c+k	2	-	-	P	B	N	N	c+k	2	-	-	P	B	N	N	c+k	2	-	-
33	S	1.92778	P	F	N	s	-	2+5	2+5	P	F	N	N	c	-	2+5	-	P	F	N	N	s	-	-	-	H	O	Y	Y	c+k	-	-	-
34	S	1.88056	P	F	N	c+b	2+5	2+5	2	P	F	N	N	c+b	-	-	-	P	F	N	N	b	2	2	2+5	P	F	N	N	c+b	2	5	-
35	S	2.19167	P	F	N	c	2+5	2+5	2+5	P	F	N	N	c	2	5	5	P	F	N	N	s	2	5	5	P	F	N	N	k+b	5	5	5
36	S	2.88056	P	F	N	c	-	2+5	-	H	O	Y	Y	c	-	-	-	H	O	Y	Y	s	-	-	-	n.a.	n.a.	n.a.	n.a.	n.a.	n.a.	n.a.	n.a.
37	S	3.13889	P	F	N	c+k	5	5	-	P	F	N	N	k	-	5	-	P	B	N	N	s	-	-	5	n.a.	n.a.	n.a.	n.a.	n.a.	n.a.	n.a.	n.a.
38	S	3.9	P	B	N	c+k	-	2+5	5	V	B	Y	Y	k	-	-	-	V	B	Y	Y	c	-	-	-	H	O	Y	N	c	-	5	2
39	S	2.93333	P	F	N	c+b	2	2+5	2	H	O	Y	Y	c	2	2+5	2	V	B	Y	N	c+k+b	2	2	-	P	B	N	Y	c+k+b	5	5	-
40	S	3.94167	P	B	N	c+b	2	2+5	2+5	n.a.	n.a.	n.a.	n.a.	n.a.	n.a.	n.a.	n.a.	n.a.	n.a.	n.a.	n.a.	n.a.	n.a.	n.a.	n.a.	n.a.	n.a.	n.a.	n.a.	n.a.	n.a.	n.a.	n.a.
41	S	2.89167	P	B	N	c	2	2+5	2+5	H	O	Y	Y	c	-	2+5	-	H	O	Y	Y	s	2	2+5	-	H	O	Y	Y	c	-	2+5	-
42	S	3.18333	P	B	N	c	-	5	5	H	O	Y	Y	c	-	-	-	H	O	Y	Y	c+k	-	-	-	V	B	Y	N	c+k	-	-	-
43	S	3.01111	P	B	N	c	-	5	2	H	O	Y	Y	c	-	5	-	V	B	Y	N	c+k	-	5	-	H	O	Y	N	c	-	5	5
44	S	2.18889	P	B	N	c+b	-	2+5	2+5	P	F	N	N	c+b	5	2+5	-	P	F	N	N	c+b	-	5	2+5	n.a.	n.a.	n.a.	n.a.	n.a.	n.a.	n.a.	n.a.
45	S	1.96667	P	F	N	c	5	2+5	2+5	P	F	N	N	c	-	5	2+5	P	F	N	N	c+k	5	2+5	-	H	O	Y	Y	c+k	-	-	-
46	S	2.04722	P	F	N	c	-	2+5	2	P	F	N	N	s	-	2+5	-	P	F	N	N	b	-	2+5	-	P	B	N	N	b	-	-	-
47	S	3.08056	P	B	N	c+b	-	2+5	5	H	O	Y	Y	c+b	-	2	2+5	V	B	Y	N	c+b	-	5	-	V	B	Y	Y	c+b	-	5	-
48	S	2.16944	P	B	N	c	-	2+5	2+5	P	F	N	N	c	2+5	5	2+5	P	F	N	N	c	2	2+5	5	H	O	Y	Y	c	2	2+5	2+5
49	M	6.21667	P	F	N	c	-	2+5	-	P	F	N	N	c	-	2+5	2+5	P	F	N	N	s	5	5	2	P	F	N	N	s	5	-	5
50	M	7.98333	P	F	N	c+b	-	-	2	P	F	N	N	c+b	-	-	2	P	F	N	N	c+b	-	2	2	P	F	N	N	c+b	2	-	-
51	M	13.1944	P	F	N	c	-	-	-	P	F	N	N	c	-	-	-	P	F	N	N	c	-	2	2	P	F	N	N	c	-	5	-
52	M	7.90556	P	F	N	c+b	-	-	-	P	F	N	N	c+k+b	-	-	-	P	F	N	N	c+k+b	-	2	2	P	F	N	N	c+k+b	-	-	-
53	M	1.16667	P	F	N	s	2	2+5	2	P	F	N	N	c	2+5	2+5	2+5	P	F	N	N	c+k	5	5	2	P	F	N	N	c	5	5	-
54	M	9.05833	P	F	N	c+k+b	-	-	-	P	F	N	N	c+k+b	-	2	-	P	F	N	N	c+b	-	2	-	P	F	N	N	c+k+b	-	-	-
55	M	4.89167	P	F	N	c	-	-	-	P	F	N	N	c	-	-	-	P	F	N	N	s	-	-	-	P	F	N	N	s	5	5	-
56	M	2.175	P	F	N	b	-	5	2+5	P	F	N	N	c+b	-	5	2+5	n.a.	n.a.	n.a.	n.a.	n.a.	n.a.	n.a.	n.a.	n.a.	n.a.	n.a.	n.a.	n.a.	n.a.	n.a.	n.a.
57	M	1.175	P	F	N	k	2	2+5	-	P	F	N	N	k	-	5	2	P	F	N	N	c+k+b	-	5	-	P	F	N	N	c+k+b	-	5	-
58	M	8.00833	P	F	N	c	-	2	2	P	F	N	N	c	-	-	-	P	F	N	N	c	-	2	2	P	F	N	N	c+k	-	2	-
59	M	3.02778	P	F	N	s	-	2+5	2	P	F	N	N	s	-	5	5	P	B	N	N	k	-	5	2+5	P	B	N	N	k	-	5	5
60	M	6.20833	P	F	N	c+b	-	2	2	P	F	N	N	c+k+b	5	-	5	P	F	N	N	b	-	-	-	P	F	N	N	b	-	-	-
61	M	3.07778	P	F	N	s	2	5	2	P	F	N	N	c	-	-	-	P	B	N	N	c	-	-	-	P	B	N	N	c	-	5	5
62	M	2.91667	P	F	N	b	2	5	-	P	F	N	N	c+k+b	-	2	-	n.a.	n.a.	n.a.	n.a.	n.a.	n.a.	n.a.	n.a.	n.a.	n.a.	n.a.	n.a.	n.a.	n.a.	n.a.	n.a.
63	M	6.98889	P	F	N	c+b	-	2+5	2	P	F	N	N	b	-	-	-	P	F	N	N	b	-	-	-	P	F	N	N	c+b	-	2	-
64	M	10.9278	P	F	N	c+b	-	2	2	P	F	N	N	c+k+b	5	-	-	P	B	N	N	c+b	-	-	-	n.a.	n.a.	n.a.	n.a.	n.a.	n.a.	n.a.	n.a.
65	M	2.19722	P	F	N	b	-	2+5	2	P	F	N	N	c+b	5	5	2	n.a.	n.a.	n.a.	n.a.	n.a.	n.a.	n.a.	n.a.	n.a.	n.a.	n.a.	n.a.	n.a.	n.a.	n.a.	n.a.
66	M	1.20833	P	F	N	s	2	2+5	2	P	F	N	N	s	-	5	2	P	F	N	N	s	2	-	2	P	F	N	N	c	-	5	2
67	M	8.97222	P	F	N	c+k+b	-	-	-	P	F	N	N	c+k+b	-	5	-	P	F	N	N	c+k+b	-	5	-	P	F	N	N	c+k+b	5	-	-
68	M	11.8306	P	F	N	c+b	-	2	2	P	F	N	N	c+b	-	-	-	P	F	N	N	c+b	-	2	-	P	F	N	N	c+b	-	-	-
69	M	1.10278	P	F	N	s	2	2	2	P	F	N	N	c	-	2	2+5	P	F	N	N	s	-	-	-	P	F	N	N	c	2	5	2
70	M	4.14167	P	F	N	c	-	2+5	-	P	F	N	N	s	-	5	-	P	F	N	N	s	-	2	-	P	F	N	N	k	-	2	5
71	M	10.2	P	F	N	c	-	2	2	P	F	N	N	k	-	-	-	P	F	N	N	k	-	2	2	P	F	N	N	c	-	5	2
72	M	10.0583	P	F	N	c+k+b	-	2+5	-	P	F	N	N	b	-	2+5	-	P	F	N	N	b	-	5	-	P	F	N	N	c+k+b	-	2+5	-
73	M	12.0028	P	F	N	c+b	-	2	2	P	F	N	N	c+b	-	2	-	P	F	N	N	b	2	2	2	P	F	N	N	c+k+b	2	5	2
74	M	18.9389	P	F	N	c	-	2	2	P	F	N	N	c	-	-	-	P	F	N	N	c	2	2	2	P	F	N	N	c	-	-	-
75	M	1.02778	P	F	N	b	2	2+5	2	P	F	N	N	b	2	2+5	2+5	P	F	N	N	b	2	2	2+5	P	F	N	N	c+b	2	2+5	2+5
76	M	0.880556	P	F	N	s	5	2+5	2+5	P	F	N	N	s	5	2+5	2+5	P	F	N	N	s	5	5	5	P	F	N	N	c	5	2+5	2+5
77	M	15.0806	P	F	N	c	-	2	2	P	F	N	N	c+k	-	-	-	P	F	N	N	c+k	-	2+5	2+5	P	F	N	N	c+k	-	-	-
78	M	4.08056	P	F	N	c+k	-	2	2+5	P	B	N	N	c+k	-	-	-	P	F	N	N	c	-	-	-	P	F	N	N	c	-	5	-
79	M	2.19444	P	F	N	s	-	2+5	2+5	P	F	N	N	c	5	-	-	P	F	N	N	c	-	-	-	P	F	N	N	c	-	-	-
80	M	9.85	P	F	N	c+k	-	-	2	P	F	N	N	c+k	-	-	-	P	F	N	N	c+k+b	-	-	-	P	F	N	N	c+k+b	2	-	-
81	M	3.14444	P	F	N	s	5	2+5	2	P	F	N	N	c	5	5	5	P	B	N	N	c	5	5	5	P	B	N	N	c	5	5	5
82	M	5.09167	P	F	N	c+b	-	-	-	P	F	N	N	c+b	-	-	-	P	F	N	N	c+k+b	-	-	-	P	F	N	N	c+b	-	5	5
83	M	2.15556	P	F	N	s	-	2+5	2+5	P	F	N	N	s	2	2+5	2+5	P	F	N	N	s	2	-	2	P	F	N	N	s	-	5	2
84	M	2.85833	P	F	N	s	2	-	-	P	B	N	N	s	2	-	-	P	B	N	N	c	2	-	-	P	B	N	N	c	-	-	-
85	M	10.9889	P	F	N	c	-	5	-	P	F	N	N	c	-	2	2	P	F	N	N	c	-	2	-	P	F	N	N	k	2	2+5	5
86	M	3.1	P	F	N	k	2	2	-	P	F	N	N	k+b	2	-	-	P	B	N	N	k+b	2	-	-	P	B	N	N	c+k+b	2	-	-
87	M	0.941667	P	F	N	s	-	2+5	2+5	P	F	N	N	k	-	2+5	2	P	F	N	N	k	2	2	-	P	F	N	N	c	5	2	2+5
88	M	9.91111	P	F	N	c	-	-	-	P	F	N	N	c	-	2+5	-	P	F	N	N	c	5	5	5	P	F	N	N	c	-	5	-
89	M	3.21944	P	F	N	s	2	2	-	P	F	N	N	s	5	5	-	P	B	N	N	s	-	-	5	P	B	N	N	c	-	5	5
90	M	7.85556	P	F	N	c+k	-	-	2	P	F	N	N	c+k	-	2	-	P	F	N	N	c+k	-	2	2+5	P	F	N	N	c+k	2	2+5	2+5
91	M	2.98889	P	F	N	s	-	-	-	P	F	N	N	c+k	-	-	-	P	B	N	N	s	-	-	2	P	B	N	N	c	-	-	-
92	M	1.96111	P	F	N	k	-	2	-	P	F	N	N	c	-	2+5	2	P	F	N	N	c	-	-	-	P	F	N	N	c	-	-	-
93	M	1.1	P	F	N	k	5	2	2	P	F	N	N	c+k	-	5	2	P	F	N	N	c+b	2	-	2	n.a.	n.a.	n.a.	n.a.	n.a.	n.a.	n.a.	n.a.
94	M	4.11111	P	F	N	c+b	2	-	5	P	B	N	N	b	5	-	5	P	F	N	N	c+b	-	-	-	P	F	N	N	c+b	2	2+5	5
95	M	15.9611	P	F	N	c	-	-	2	P	F	N	N	c	-	-	-	P	F	N	N	c+b	-	-	-	P	F	N	N	k+b	-	-	-
96	M	9.95556	P	F	N	c+k	-	2+5	2+5	P	F	N	N	c	-	5	-	P	F	N	N	k	-	2+5	-	P	F	N	N	k	-	2+5	5
97	M	17.0833	P	F	N	c+b	-	2	2	P	F	N	N	b	-	5	5	P	F	N	N	b	-	2	2	P	F	N	N	b	-	-	5
98	M	12.9972	P	F	N	c+k+b	-	-	-	P	B	N	N	c+b	-	-	-	P	B	N	N	c+k+b	-	-	-	P	B	N	N	b	-	-	5
99	M	2.07222	P	F	N	k+b	5	-	-	P	F	N	N	k+b	-	5	2	P	F	N	N	b	-	-	-	P	F	N	N	c+b	5	-	-
100	M	1.18611	P	F	N	s	2	2+5	2+5	P	F	N	N	c	5	-	-	P	F	N	N	c	5	5	-	P	F	N	N	s	5	5	-
101	M	0.916667	P	F	N	s	5	2+5	2	P	F	N	N	c	-	5	-	P	F	N	N	k	-	-	-	n.a.	n.a.	n.a.	n.a.	n.a.	n.a.	n.a.	n.a.
102	M	10.8722	P	F	N	b	-	2+5	2	P	F	N	N	c+b	-	2	2	P	F	N	N	c+b	-	-	-	P	F	N	N	b	-	-	2
103	M	2.1	P	F	N	c+b	2+5	2+5	2	P	F	N	N	c+b	5	5	5	P	F	N	N	c+b	2+5	5	5	P	F	N	N	c+b	5	5	5
104	M	2.99167	P	F	N	s	-	-	-	P	F	N	N	s	-	-	-	P	B	N	N	c	-	-	-	P	B	N	N	s	-	-	-
105	M	16.1889	P	F	N	c	-	2	2	P	F	N	N	c+k	-	-	-	P	F	N	N	c	-	2+5	2+5	P	F	N	N	s	-	-	-
106	M	8.91111	P	F	N	b	-	2	2	P	F	N	N	c+b	-	-	5	P	F	N	N	c+b	-	-	-	P	F	N	N	b	-	5	-
107	M	8.06389	P	F	N	c+k	-	2	2	P	F	N	N	c+k	-	-	-	P	B	N	N	c	-	-	-	P	F	N	N	c	2+5	-	5
108	M	17.9222	P	F	N	c+b	-	5	-	P	F	N	N	c+b	-	5	-	P	F	N	N	b	-	-	-	n.a.	n.a.	n.a.	n.a.	n.a.	n.a.	n.a.	n.a.
109	M	12.8806	P	F	N	c	-	2	2	P	F	N	N	c+k	2	5	-	P	F	N	N	c+k+b	-	2	2	P	F	N	N	c+k+b	-	2+5	-
110	M	10.9972	P	F	N	c+k	-	-	-	P	F	N	N	c+k	-	-	-	P	F	N	N	c+k	-	2	2+5	P	F	N	N	c+k	-	5	5
111	M	3.14444	P	F	N	b	5	2	2	P	F	N	N	c+k+b	2	5	-	P	B	N	N	c+k+b	5	-	-	P	B	N	N	c+k+b	5	5	5
112	M	5.94444	P	F	N	c+k	-	2+5	2+5	P	F	N	N	c	-	2	-	P	F	N	N	c	2	2+5	5	P	F	N	N	c+k	2	2+5	-
113	M	1.20833	P	F	N	c	-	2	2	P	F	N	N	s	-	5	5	P	F	N	N	s	2	2	-	P	F	N	N	b	-	-	-
114	M	7.69722	P	F	N	c	2	2+5	2	P	F	N	N	c	2+5	5	5	P	F	N	N	c	-	-	-	P	F	N	N	c+k	5	5	-
115	M	3.18611	P	F	N	c+b	2+5	2+5	2+5	P	F	N	N	b	5	5	2+5	P	B	N	N	k+b	5	2	5	P	B	N	N	c+b	5	-	-
116	M	2.88889	P	F	N	s	-	2+5	5	P	F	N	N	c	-	-	-	P	B	N	N	c	2	-	-	P	B	N	N	c+k	2	-	-
117	M	4.99167	P	F	N	c	-	-	5	P	F	N	N	c	2	2	-	n.a.	n.a.	n.a.	n.a.	n.a.	n.a.	n.a.	n.a.	n.a.	n.a.	n.a.	n.a.	n.a.	n.a.	n.a.	n.a.
118	M	13.0167	P	F	N	c+b	-	2	2	P	F	N	N	c+b	-	-	-	P	F	N	N	c+b	-	5	-	P	F	N	N	c+b	2	-	-
119	M	0.986111	P	F	N	s	2+5	2+5	2+5	P	F	N	N	c	5	5	5	P	F	N	N	s	5	5	5	P	F	N	N	s	-	5	5
120	M	18.9611	P	F	N	c+k	-	2+5	2	P	F	N	N	c+k+b	-	5	5	P	F	N	N	c+k+b	-	-	-	P	F	N	N	c+k+b	-	5	2+5
121	M	8.03889	P	F	N	c	-	-	-	P	F	N	N	s	-	-	-	P	F	N	N	s	-	-	2	P	F	N	N	s	-	-	-
122	M	9.20833	P	F	N	c+k	-	5	-	P	F	N	N	c+k	-	-	-	P	F	N	N	s	-	2	2	P	F	N	N	c	-	5	-
123	M	1	P	F	N	s	2	2+5	2	P	F	N	N	s	-	2	2+5	P	F	N	N	s	2	-	-	P	F	N	N	c	-	5	-
124	M	3.93056	P	F	N	c	-	-	-	P	B	N	N	s	-	-	-	P	F	N	N	c+k	-	-	-	n.a.	n.a.	n.a.	n.a.	n.a.	n.a.	n.a.	n.a.
125	M	4.14722	P	F	N	c+b	-	5	-	P	F	N	N	b	2+5	-	-	P	F	N	N	b	5	-	5	P	F	N	N	c+b	-	5	-
126	M	6.84722	P	F	N	c+k	-	2	2	P	F	N	N	k	-	2+5	-	P	F	N	N	b	-	2	2	P	F	N	N	k+b	5	5	2+5
127	M	4.88056	P	F	N	c	-	-	-	P	F	N	N	s	-	5	5	P	F	N	N	b	-	2	2	P	F	N	N	b	-	5	2
128	M	2.24167	P	F	N	s	-	2	2	P	F	N	N	s	-	5	-	P	F	N	N	s	-	-	-	P	F	N	N	c	-	5	2+5
129	M	4.17778	P	F	N	c+b	-	2+5	2	P	B	N	N	c+k+b	2	-	-	P	F	N	N	c+b	-	-	-	P	F	N	N	c+k+b	-	2+5	-
130	M	7.20556	P	F	N	c	-	2	2	P	F	N	N	c	-	-	5	P	F	N	N	c	-	-	-	P	F	N	N	c	-	-	-
131	M	4.09722	P	F	N	c+b	-	2	2+5	P	B	N	N	c+b	-	-	-	P	B	N	N	c+b	-	2	-	P	F	N	N	c+b	-	-	-
132	M	5.94722	P	F	N	k	-	-	-	P	F	N	N	k+b	-	-	-	P	F	N	N	c	-	5	-	P	B	N	N	c	2	5	5
133	M	18.2917	P	F	N	c	-	2	-	P	F	N	N	c	-	-	-	P	F	N	N	c	-	2	-	P	F	N	N	c	-	5	-
134	M	12.8833	P	F	N	c+b	-	-	-	P	F	N	N	c+b	-	-	-	P	F	N	N	c+b	-	2	-	P	F	N	N	c+b	-	-	-
135	M	1.97778	P	F	N	s	2	2+5	2	P	F	N	N	c	-	2+5	2+5	P	F	N	N	b	2	5	2	n.a.	n.a.	n.a.	n.a.	n.a.	n.a.	n.a.	n.a.
136	M	14.075	P	F	N	c	-	-	2	P	F	N	N	c	-	-	-	P	F	N	N	c+k	-	-	2	P	F	N	N	b	2	2+5	5
137	M	0.963889	P	F	N	s	-	2+5	2+5	P	F	N	N	c	-	5	2+5	P	F	N	N	c	-	-	2	P	F	N	N	c	2	5	2+5
138	M	2.96667	P	F	N	s	2	5	-	P	F	N	N	c+b	2	-	-	P	B	N	N	c+b	2	-	2	P	B	N	N	c+b	2	2	-
139	M	3.125	P	F	N	k	-	5	-	P	B	N	N	c+k	-	-	-	P	B	N	N	c+k	-	-	2	P	B	N	N	c+k	-	-	-
140	M	5.91389	P	F	N	b	2	-	-	P	F	N	N	b	2	-	-	P	F	N	N	b	2	2	-	P	F	N	N	b	-	5	5
141	M	3.02778	P	F	N	c+b	-	-	-	P	F	N	N	c+b	-	-	-	P	B	N	N	c+k+b	-	-	-	P	B	N	N	c+k+b	-	-	-
142	M	4.97222	P	F	N	c	-	-	-	P	F	N	N	c	-	-	-	P	F	N	N	k	2	2+5	2	P	F	N	N	c+k	-	5	5
143	M	1.91667	P	F	N	s	2	-	2	P	F	N	N	c	2+5	-	-	P	F	N	N	c+k	-	-	2	P	F	N	N	s	-	2	2+5
144	M	8.99444	P	F	N	c+b	-	2	-	P	F	N	N	b	-	2+5	5	P	F	N	N	c+b	-	-	-	P	F	N	N	c+b	-	2	-
145	M	6	P	F	N	k+b	2	2+5	2	P	F	N	N	k+b	2	-	2	P	F	N	N	c+k+b	-	2+5	2	P	F	N	N	c+k+b	-	5	2+5
146	M	11.6111	P	F	N	c	-	2	2	P	F	N	N	s	-	-	-	P	F	N	N	c	-	-	-	P	F	N	N	c	-	-	-
147	M	11.8278	P	F	N	c+k	2	2	2	P	F	N	N	c+k	2	-	-	P	F	N	N	c+k	2	2+5	-	n.a.	n.a.	n.a.	n.a.	n.a.	n.a.	n.a.	n.a.
148	M	3.97778	P	F	N	c	2+5	2+5	2+5	P	B	N	N	c	5	2+5	-	P	F	N	N	c	-	2+5	2	P	F	N	N	c	5	2+5	5
149	M	13.2444	P	F	N	c+k+b	-	2+5	2	P	F	N	N	c+k+b	-	-	-	P	F	N	N	k+b	-	-	-	P	F	N	N	c+b	-	-	-
150	M	8.23333	P	F	N	c+k	-	-	-	P	F	N	N	k	-	-	-	P	F	N	N	k	-	-	-	P	F	N	N	k	-	5	2+5
151	M	6.225	P	F	N	c+b	-	5	-	P	F	N	N	c+b	-	2+5	-	P	F	N	N	c+b	-	5	-	P	F	N	N	c+b	-	5	-
152	M	1.89444	P	F	N	s	2	2+5	2	P	F	N	N	s	5	2+5	2+5	P	F	N	N	k	-	2	2	P	F	N	N	c+k	-	2+5	2+5
153	M	2.88889	P	F	N	c+k	5	2+5	2	P	F	N	N	s	5	2+5	-	P	B	N	N	k	-	5	-	P	B	N	N	c+k	5	5	-
154	M	2.04722	P	F	N	s	5	2+5	2	P	F	N	N	s	-	2+5	2	n.a.	n.a.	n.a.	n.a.	n.a.	n.a.	n.a.	n.a.	n.a.	n.a.	n.a.	n.a.	n.a.	n.a.	n.a.	n.a.
155	M	4.86389	P	F	N	c	2	2	-	P	F	N	N	c+b	-	-	-	P	F	N	N	c+b	-	-	-	P	F	N	N	b	-	5	5
156	M	17.8722	P	F	N	c+k	-	2	2	P	F	N	N	c+k	-	-	-	P	F	N	N	s	-	2	2	P	F	N	N	c	-	-	-
157	M	3.07222	P	F	N	s	-	5	-	P	B	N	N	b	-	-	-	P	B	N	N	c+b	5	-	-	P	B	N	N	b	5	-	-
158	M	1.96944	P	F	N	c	2	2+5	2	P	F	N	N	c+b	2+5	5	2	P	F	N	N	c	2	-	-	P	F	N	N	c	2	5	2+5
159	M	1.03333	P	F	N	s	-	2+5	2	P	F	N	N	s	2	2+5	2	P	F	N	N	s	-	5	-	P	F	N	N	c	-	2+5	-
160	M	15.0611	P	F	N	c	-	2	-	P	F	N	N	c	-	-	-	P	F	N	N	c	2	2+5	2+5	P	F	N	N	c+k	2	5	5
161	M	5.04167	P	F	N	c+k+b	-	2	2	P	F	N	N	c+b	-	-	-	P	F	N	N	c+b	-	2	-	P	F	N	N	c+b	-	-	2+5
162	M	6.92778	P	F	N	c+b	-	2+5	2+5	P	F	N	N	b	-	-	-	P	F	N	N	b	-	2	2	P	F	N	N	c+k+b	-	-	-
163	G	9.18889	P	B	N	c+b	-	5	5	P	B	N	N	c+b	-	5	-	P	B	N	N	b	-	5	-	P	B	N	N	k+b	-	-	-
164	G	13.1417	P	B	N	c+b	-	-	-	P	B	N	N	c+b	-	-	-	P	B	N	N	c+b	-	-	-	P	B	N	N	b	-	-	5
165	G	12.8472	P	B	N	c	-	2+5	-	P	B	N	N	c	-	-	-	P	B	N	N	s	2	2	-	P	B	N	N	s	2	-	-
166	G	13.1444	P	B	N	b	-	2	5	P	B	N	N	c+b	2	2	-	P	B	N	N	c+b	-	2	-	P	B	N	N	c+b	2	-	-
167	G	10.9861	P	B	N	c+b	-	-	5	P	B	N	N	c+k+b	-	-	-	P	B	N	N	k+b	-	-	-	n.a.	n.a.	n.a.	n.a.	n.a.	n.a.	n.a.	n.a.
168	G	3.96389	P	B	N	c+k+b	-	2+5	2	P	B	N	N	k	-	-	-	P	B	N	N	k+b	2	2+5	2	P	B	N	N	k+b	2	-	-
169	S	8.11111	V	O	Y	s	-	5	-	H	O	Y	Y	s	-	-	-	V	O	Y	Y	s	-	5	-	H	O	Y	Y	k	-	5	5
170	S	20.1611	H	B	N	s	-	2	-	H	O	N	N	c	-	-	-	H	O	N	N	c	-	2	-	H	O	N	N	c	-	-	-
171	S	8.95833	V	B	Y	s	-	2	-	V	B	Y	N	s	2	5	-	V	B	Y	N	s	5	2	-	V	B	Y	N	k	-	2+5	-
172	S	5.12222	V	B	Y	k	-	-	-	V	B	Y	N	c	-	-	-	H	O	Y	Y	s	-	-	-	V	O	Y	Y	s	-	-	-
173	S	7.93889	V	O	Y	s	-	-	-	V	O	Y	N	s	-	-	-	V	O	Y	N	k	-	-	-	V	O	Y	N	c+k	-	5	-
174	S	4.86111	V	B	Y	b	-	-	-	H	O	Y	Y	c+b	-	-	-	V	B	Y	Y	c+k+b	-	-	-	V	O	Y	N	c+b	-	-	-
175	S	18.8889	V	B	Y	s	-	-	-	H	O	Y	Y	s	-	-	-	V	B	Y	Y	s	-	-	-	V	B	Y	N	c	-	-	-
176	S	21.0806	V	B	Y	s	5	5	5	H	O	Y	Y	s	5	5	5	V	B	Y	Y	c	5	-	-	V	B	Y	N	s	5	5	5
177	S	22.925	V	B	Y	s	-	2	-	V	B	Y	N	k	-	-	-	H	O	Y	Y	s	-	2	-	V	B	Y	Y	c	-	-	-
178	S	10.1667	P	B	N	c+k+b	-	2+5	2	H	O	Y	Y	k+b	-	-	-	H	O	Y	Y	k+b	-	-	-	V	O	Y	N	c+k+b	-	5	-
179	S	5.925	V	B	Y	k+b	-	5	-	V	B	Y	N	c+k+b	-	-	-	V	B	Y	N	c+k+b	-	2	-	H	O	Y	Y	k+b	-	5	-
180	S	7.89444	V	B	Y	s	-	-	-	V	B	Y	N	s	-	-	-	V	B	Y	N	s	-	5	2+5	V	B	Y	N	c	-	-	-
181	S	12.825	V	B	Y	s	-	2	-	V	B	Y	N	c	-	-	-	V	B	Y	N	c	-	2	-	V	B	Y	N	c	2	-	-
182	S	15.9722	V	B	Y	s	-	-	-	n.a.	n.a.	n.a.	n.a.	n.a.	n.a.	n.a.	n.a.	n.a.	n.a.	n.a.	n.a.	n.a.	n.a.	n.a.	n.a.	n.a.	n.a.	n.a.	n.a.	n.a.	n.a.	n.a.	n.a.
183	S	5.88333	V	B	Y	k+b	5	5	2+5	V	B	Y	N	b	-	5	-	V	B	Y	N	c+k+b	-	-	-	H	O	Y	Y	c+k+b	5	5	-
184	S	12.9083	V	B	Y	b	-	2	-	V	B	Y	N	b	-	-	-	V	B	Y	N	c+k+b	-	2	-	V	B	Y	N	c+k+b	-	-	2
185	S	5.075	V	B	Y	s	-	-	-	V	B	Y	N	s	-	-	-	V	B	Y	N	s	-	-	-	H	O	Y	Y	c	-	5	5
186	S	9.83056	V	B	Y	s	-	-	-	H	O	Y	Y	s	-	-	-	V	B	Y	Y	c	-	-	-	V	B	Y	N	s	-	-	-
187	S	16.9306	V	O	Y	s	-	-	-	V	O	Y	N	k	2	-	-	V	O	Y	N	k	-	-	-	V	O	Y	N	c+k	-	2+5	5
188	S	19.1056	V	B	Y	c	-	-	-	V	B	Y	N	c	2	2	-	V	B	Y	N	c	-	-	-	H	O	Y	Y	c	2	-	-
189	S	11.1361	V	O	Y	b	-	-	-	V	O	Y	N	k+b	-	-	-	V	O	Y	N	c+k+b	-	-	-	V	B	Y	N	c+b	2	-	-
190	S	13.8722	V	B	Y	s	-	-	-	V	B	Y	N	s	-	-	-	V	B	Y	N	c	-	-	-	V	B	Y	N	c	-	-	-
191	S	11.2083	V	B	Y	s	-	-	-	V	B	Y	N	s	-	-	-	V	B	Y	N	s	-	-	-	V	B	Y	N	c	-	-	-
192	S	4.86389	H	B	Y	s	-	-	-	V	B	Y	Y	k	-	-	-	V	B	Y	Y	c+k+b	-	-	-	H	O	Y	Y	c+k+b	-	5	-
193	S	6.94167	H	B	Y	s	-	-	-	V	B	Y	Y	c	-	-	-	V	O	Y	Y	s	-	-	-	H	O	Y	Y	c	5	-	-
194	S	4.93889	H	B	Y	s	-	2+5	5	V	B	Y	Y	s	2	5	-	V	B	Y	Y	c+k	-	-	-	V	B	Y	Y	c	-	-	-
195	S	18.8806	V	B	Y	s	-	-	-	V	B	Y	N	k	-	-	-	V	O	Y	N	c+k	-	-	-	V	O	Y	N	c+k	-	-	-
196	S	6.94167	V	B	Y	s	-	5	-	H	O	Y	Y	s	-	2+5	5	H	O	Y	Y	s	-	2+5	-	V	B	Y	Y	c+k	5	-	-
197	S	7.08333	V	O	Y	b	-	5	-	H	O	Y	Y	b	-	-	-	V	B	Y	Y	b	-	-	-	V	B	Y	N	k+b	-	-	-
198	S	14.0111	V	B	Y	s	-	-	-	P	B	N	Y	s	-	-	-	P	B	N	Y	c	-	2	-	H	O	Y	Y	c	-	2+5	-
199	S	4.21667	H	B	Y	s	-	2	-	V	B	Y	Y	s	-	-	-	n.a.	n.a.	n.a.	n.a.	n.a.	n.a.	n.a.	n.a.	n.a.	n.a.	n.a.	n.a.	n.a.	n.a.	n.a.	n.a.
200	S	25.8028	P	B	N	c	-	-	-	H	O	N	Y	c	-	5	-	H	O	N	Y	c	-	2	-	H	O	N	Y	c+k	-	-	-
201	S	23.0361	V	B	Y	s	-	-	-	H	O	Y	Y	c	-	5	-	H	O	Y	Y	s	-	-	-	H	O	Y	Y	c	-	-	-
202	S	21.0333	P	B	N	c	-	2	-	H	O	N	Y	c	-	-	-	P	B	N	Y	c	-	2	-	H	O	N	Y	s	2	-	-
203	S	4.89722	V	B	Y	s	-	-	-	H	O	Y	Y	c	-	5	-	H	O	Y	Y	s	-	2+5	2	H	O	Y	Y	s	-	-	5
204	S	7.12222	V	B	Y	b	-	-	2	V	B	Y	N	c+b	-	-	-	H	O	Y	Y	b	2	-	-	V	B	Y	Y	b	2	-	2
205	S	4.85556	V	B	Y	k	2	5	-	H	O	Y	Y	c+k	2	5	-	V	B	Y	Y	c+k	2	5	-	n.a.	n.a.	n.a.	n.a.	n.a.	n.a.	n.a.	n.a.
206	S	22.0306	V	B	N	k+b	-	-	-	V	B	N	N	k	-	-	-	H	O	N	Y	s	2	2	-	H	O	N	Y	c+b	-	2	-
207	S	4.025	H	B	Y	s	2	2	-	V	B	Y	Y	s	-	-	-	V	B	Y	Y	c	-	-	-	V	O	Y	Y	c	-	5	-
208	S	6.96389	V	B	Y	s	-	-	-	V	B	Y	N	s	-	-	-	H	O	Y	Y	s	-	-	-	V	B	Y	Y	c	-	-	-
209	S	12.9472	V	B	Y	s	-	-	-	V	B	Y	N	s	-	-	-	H	O	Y	Y	c+k	-	5	-	V	B	Y	Y	c+k	-	-	-
210	S	5.95556	V	B	Y	b	-	-	-	V	B	Y	N	b	-	-	-	H	O	Y	Y	c+b	-	-	-	V	O	Y	Y	c+b	-	-	5
211	S	15.1694	V	B	Y	s	-	-	-	V	B	Y	N	s	-	-	-	V	B	Y	N	c	-	-	-	V	B	Y	N	c	-	-	-
212	S	17.9528	V	B	Y	k	-	2	-	H	O	Y	Y	c+k	-	2	-	V	B	Y	Y	c+k	-	-	-	V	B	Y	N	c+k	-	5	2
213	S	4.19722	H	B	Y	s	-	-	-	V	B	Y	Y	s	-	5	-	V	B	Y	Y	c	-	-	-	P	B	N	Y	s	-	-	-
214	S	8.91944	V	O	Y	s	-	2	5	V	O	Y	N	k	2	2+5	-	V	O	Y	N	s	-	2	-	V	O	Y	N	c+k	-	5	5
215	S	5.94722	V	O	Y	s	-	2+5	2+5	V	O	Y	N	s	-	5	2+5	V	B	Y	N	c+k+b	-	-	2+5	V	B	Y	N	c+k+b	-	5	2+5
216	S	5.96389	V	B	Y	c+b	5	5	5	H	O	Y	Y	c+b	-	5	-	V	B	Y	Y	c+b	-	5	-	H	O	Y	Y	c+b	-	2+5	-
217	S	8.81389	H	B	Y	s	2	5	-	V	B	Y	Y	k	-	2+5	-	V	O	Y	Y	c+k	5	5	5	H	O	Y	Y	s	-	2+5	2+5
218	S	5.15556	V	B	Y	b	-	-	-	V	B	Y	N	b	-	2	-	V	B	Y	N	c+b	-	-	-	H	O	Y	Y	c+b	-	-	-
219	S	3.92778	V	B	Y	s	-	2	-	n.a.	n.a.	n.a.	n.a.	n.a.	n.a.	n.a.	n.a.	n.a.	n.a.	n.a.	n.a.	n.a.	n.a.	n.a.	n.a.	n.a.	n.a.	n.a.	n.a.	n.a.	n.a.	n.a.	n.a.
220	S	4.83056	V	O	Y	s	-	2+5	-	V	O	Y	N	k	-	-	-	V	O	Y	N	s	-	-	-	H	O	Y	Y	s	-	2	-
221	S	14.9861	H	B	Y	s	-	-	-	V	B	Y	Y	s	-	-	-	V	B	Y	Y	c	-	-	-	V	B	Y	Y	c	-	-	-
222	S	3.93611	H	B	Y	s	2	-	-	H	O	Y	N	s	-	2+5	-	P	B	N	Y	c+k	-	-	-	n.a.	n.a.	n.a.	n.a.	n.a.	n.a.	n.a.	n.a.
223	S	10.8833	V	B	Y	k	-	2+5	2	V	B	Y	N	s	-	2	-	H	O	Y	Y	c	-	2	5	V	B	Y	Y	c	-	5	5
224	S	16.9556	V	B	Y	s	-	-	-	V	B	Y	N	s	-	-	-	V	B	Y	N	c	-	-	-	V	B	Y	N	c	-	-	-
225	S	14.9528	V	B	Y	c	-	-	-	V	B	Y	N	c	-	5	-	V	B	Y	N	c+k	-	-	-	V	B	Y	N	c	-	-	-
226	S	10.9833	V	O	Y	s	-	-	-	V	O	Y	N	s	-	-	-	V	O	Y	N	s	-	-	-	V	O	Y	N	s	-	-	-
227	S	10.1028	V	B	Y	s	-	-	-	V	B	Y	N	c	-	-	-	H	O	Y	Y	c+k	-	-	-	H	O	Y	Y	c+k	-	-	2
228	S	10.9389	V	B	Y	s	-	-	-	V	B	Y	N	s	-	5	-	H	O	Y	Y	c+k	2	2	-	V	B	Y	Y	k	-	-	-
229	S	12.0528	V	B	Y	s	-	-	2	V	B	Y	N	s	-	-	-	H	O	Y	Y	k	-	2	-	V	B	Y	Y	k	-	-	-
230	S	17.9611	V	B	Y	s	-	-	-	V	B	Y	N	c	-	-	-	V	B	Y	N	s	-	-	-	H	O	Y	Y	c	-	-	-
231	S	6.825	V	B	Y	s	5	-	-	H	O	Y	Y	c	5	2	-	H	O	Y	Y	c	-	-	-	V	B	Y	Y	s	-	-	-
232	S	19.9861	V	B	Y	s	2	2+5	-	V	B	Y	N	s	-	2	-	H	B	Y	Y	s	2	2+5	-	V	B	Y	Y	s	-	5	-
233	S	20.0806	V	B	Y	s	-	5	-	V	B	Y	N	c	-	-	-	V	B	Y	N	c	-	-	-	H	O	Y	Y	c	-	-	-
234	S	9.99167	V	O	Y	s	-	-	-	V	O	Y	N	k	-	-	-	V	O	Y	N	k	5	-	-	V	O	Y	N	c+k	-	5	5
235	S	5.87222	V	B	Y	b	-	5	-	V	B	Y	N	c+b	-	-	-	H	O	Y	Y	c+b	-	2	5	V	B	Y	Y	c+b	-	-	-
236	S	11.0389	H	B	Y	s	-	-	-	V	B	Y	Y	s	2+5	2+5	-	V	O	Y	Y	c	-	-	-	V	B	Y	Y	c	2	-	-
237	S	14.8556	V	B	Y	s	-	-	-	V	B	Y	N	s	-	-	-	V	B	Y	N	s	-	-	-	V	B	Y	N	c	-	-	-
238	S	12.9639	V	B	Y	s	-	-	-	H	O	Y	Y	c	-	5	-	V	B	Y	Y	c	-	-	-	V	B	Y	N	c	-	2	-
239	S	5.83333	V	B	Y	b	-	-	2	H	O	Y	Y	b	-	-	-	H	O	Y	Y	b	-	-	-	n.a.	n.a.	n.a.	n.a.	n.a.	n.a.	n.a.	n.a.
240	S	13.8889	V	B	Y	k	-	2	-	H	O	Y	Y	c	-	-	-	V	B	Y	Y	s	-	-	-	V	B	Y	N	c+k	-	2	-
241	S	12.9778	V	B	Y	b	-	-	-	V	B	Y	N	b	-	-	-	V	B	Y	N	c+b	-	-	-	V	B	Y	N	c+b	-	-	-
242	S	3.95	H	B	Y	s	2+5	5	5	n.a.	n.a.	n.a.	n.a.	n.a.	n.a.	n.a.	n.a.	n.a.	n.a.	n.a.	n.a.	n.a.	n.a.	n.a.	n.a.	n.a.	n.a.	n.a.	n.a.	n.a.	n.a.	n.a.	n.a.
243	S	4.175	H	B	Y	s	-	-	-	V	B	Y	Y	s	-	-	-	V	B	Y	Y	s	2	-	-	H	O	Y	Y	c	-	-	-
244	S	4.05	H	B	Y	b	-	2+5	-	P	B	N	Y	c+b	-	5	-	n.a.	n.a.	n.a.	n.a.	n.a.	n.a.	n.a.	n.a.	n.a.	n.a.	n.a.	n.a.	n.a.	n.a.	n.a.	n.a.
245	S	7.09722	V	B	Y	b	-	-	-	H	O	Y	Y	c+b	-	-	5	V	B	Y	Y	c+b	-	-	-	V	B	Y	N	c+b	-	-	-
246	S	4.13889	H	B	Y	s	2	2+5	-	V	B	Y	Y	c	-	-	-	V	B	Y	Y	c+k	-	-	-	V	B	Y	Y	c+k	5	2+5	-
247	S	12.9083	V	B	Y	s	-	2+5	-	H	O	Y	Y	s	-	-	-	H	O	Y	Y	c	-	2	-	V	B	Y	Y	c	-	5	2+5
248	S	13.825	V	O	Y	s	-	2	-	V	O	Y	N	b	-	-	-	V	O	Y	N	c+b	-	-	-	V	O	Y	N	c+b	-	5	-
250	S	11.8278	V	B	Y	s	-	2	-	H	O	Y	Y	c	-	2	-	V	B	Y	Y	k	2	-	-	V	B	Y	N	s	2	-	-
251	S	7.22222	V	O	Y	s	-	-	-	V	O	Y	N	s	-	-	-	V	O	Y	N	s	-	-	-	H	O	Y	Y	c+k	-	-	-
252	S	24.2194	H	B	N	s	-	2+5	-	H	O	N	N	c	5	-	-	H	O	N	N	c	-	2	-	H	O	N	N	c	-	-	2
253	S	11.9389	V	O	Y	s	-	-	-	V	O	Y	N	s	-	-	-	V	O	Y	N	c	-	-	-	V	B	Y	N	c	-	-	-
254	S	5.96667	H	B	Y	k	-	2	-	V	B	Y	Y	k	-	-	-	V	B	Y	Y	c+k	-	-	-	V	B	Y	Y	c+k+b	-	-	-
255	S	21.0861	V	B	Y	s	-	-	-	V	B	Y	N	s	-	-	-	V	B	Y	N	c+k	-	-	-	H	O	Y	Y	k	-	-	5
256	S	8.20833	P	B	N	c	-	2+5	-	V	B	Y	Y	s	-	-	-	H	O	Y	N	c+k	-	2	-	V	B	Y	N	c+k	-	-	-
257	S	8.99444	H	B	Y	s	2	-	-	V	B	Y	Y	k	2	5	-	V	B	Y	Y	k	2	5	-	V	B	Y	Y	s	2+5	5	-
258	S	11.8833	V	B	Y	k+b	5	5	5	V	B	Y	N	b	5	5	-	V	B	Y	N	b	5	5	-	V	B	Y	N	k+b	2+5	5	5
259	S	21.95	V	B	Y	k	-	2+5	2	V	B	Y	N	k	-	5	-	V	B	Y	N	c+k	5	5	-	V	B	Y	N	c+k	5	5	5
260	S	21.8972	H	B	Y	k+b	-	-	-	H	O	Y	N	c+k+b	-	5	5	H	O	Y	N	c+k+b	-	-	-	H	O	Y	N	c+k+b	-	-	-
261	S	16.1806	V	B	Y	b	-	-	-	V	B	Y	N	b	-	-	-	V	B	Y	N	c+b	-	-	-	V	B	Y	N	c+k+b	-	-	5
262	S	19.8333	V	B	Y	s	-	5	-	V	B	Y	N	s	5	-	-	V	B	Y	N	c+k	5	-	-	V	B	Y	N	c	5	5	-
263	S	13.8972	V	O	Y	s	-	-	-	V	O	Y	N	k	-	2	-	H	O	Y	Y	k	-	-	-	V	B	Y	Y	c	-	-	-
264	S	21.875	H	B	Y	s	5	-	5	n.a.	n.a.	n.a.	n.a.	n.a.	n.a.	n.a.	n.a.	n.a.	n.a.	n.a.	n.a.	n.a.	n.a.	n.a.	n.a.	n.a.	n.a.	n.a.	n.a.	n.a.	n.a.	n.a.	n.a.
265	S	12.1722	H	B	Y	s	-	2	-	V	B	Y	Y	k	-	-	-	V	B	Y	Y	c+k	-	-	-	V	B	Y	Y	c+k	2	2	2
266	S	18.2139	H	B	Y	s	-	5	-	V	B	Y	Y	s	-	-	-	V	B	Y	Y	c+k	-	-	-	V	B	Y	Y	c+k	2	2	-
267	S	5.925	V	B	Y	s	5	5	-	V	B	Y	N	s	-	5	-	H	O	Y	Y	s	5	5	-	H	O	Y	Y	s	5	2+5	5
